# Supplementary material
Source: PubMed Central journal article supplement (PMC7335905)
Supplement: mmc1.pdf [file mmc1.pdf]

**Biophysical Journal, Volume 119**

**Supplemental Information**

**Improving the Accuracy of Protein Thermostability Predictions for Single Point Mutations**

**Jianxin Duan, Dmitry Lupyan, and Lingle Wang**

## Supporting Material

### Improving the accuracy of protein thermostability predictions for single point mutations

Jianxin Duan\*, Dmitry Lupyan#, Lingle Wang#

\* Schrödinger GmbH, Q7,23, 68161 Mannheim, Germany

# Schrödinger Inc. 120 West 45<sup>th</sup> Street, 17<sup>th</sup> floor, New York, NY 10036-4641, U. S. A.

**Table S1. FEP+ predictions using different unfolded model in comparison with experiment and Residue scanning. The values in parentheses are prior to outlier analysis**

| PDB  | Wild type | Res Num | Mutant | $\Delta\Delta G$ Exp | Mono peptide | Tri peptide      | Penta peptide | Hepta peptide | Residue Scan. |
|------|-----------|---------|--------|----------------------|--------------|------------------|---------------|---------------|---------------|
| 1EY0 | THR       | 22      | CYS    | 0.9                  | -0.15        | -0.35            | 0.63          | -0.35         | 7.29          |
| 1EY0 | THR       | 22      | VAL    | 0.9                  | 0.94         | 1.05             | 1.18          | 1.14          | 2.31          |
| 1EY0 | VAL       | 23      | LEU    | 0.1                  | -0.61        | -0.34            | -0.02         | -0.5          | -3.29         |
| 1EY0 | LEU       | 25      | ILE    | 1.7                  | 2.08         | 1.72             | 1.91          | 1.84          | 14.51         |
| 1EY0 | THR       | 33      | VAL    | -0.4                 | -0.53        | -0.51            | -0.14         | -0.4          | -5.29         |
| 1EY0 | THR       | 41      | CYS    | -0.6                 | 1.59         | -0.52            | -0.31         | -1.08         | 13.83         |
| 1EY0 | THR       | 41      | ILE    | -0.7                 | 2.87         | -1.4             | -1.27         | -0.57         | 2.93          |
| 1EY0 | THR       | 41      | SER    | 1.1                  | 2.63         | 1.04             | 1.24          | 1.04          | 9.47          |
| 1EY0 | THR       | 41      | VAL    | -0.8                 | 2.79         | -1.69            | -1.59         | -1.45         | 2.54          |
| 1EY0 | THR       | 44      | VAL    | -0.1                 | -0.57        | 0.04             | -0.45         | 0.45          | -0.93         |
| 1EY0 | SER       | 59      | ALA    | -0.5                 | -0.54        | -0.73            | -0.43         | 0.26          | -5.31         |
| 1EY0 | THR       | 62      | SER    | 2.1                  | 0.2          | 1.09<br>(-0.34)  | -0.17         | 0.04          | 6.38          |
| 1EY0 | THR       | 62      | VAL    | 0.2                  | -2.61        | -2.43<br>(-2.61) | -2.43         | -2.43         | 4.52          |
| 1EY0 | VAL       | 66      | ILE    | 1                    | -0.12        | -0.5<br>(-0.3)   | 0.15          | 0.37          | 4.01          |
| 1EY0 | VAL       | 66      | LEU    | 0.3                  | -3.4         | -2.71            | -2.82         | -2.52         | -2.88         |

|      |     |     |     |      |       |                 |       |       |       |
|------|-----|-----|-----|------|-------|-----------------|-------|-------|-------|
|      |     |     |     |      |       | (-3.12)         |       |       |       |
| 1EY0 | VAL | 66  | LYS | 7.5  | 13.16 | 6.69<br>(16.28) | 15.04 | 15.25 | 45.03 |
| 1EY0 | ILE | 72  | LEU | 0.2  | 0.08  | 0.54            | 0.25  | 0.68  | 2.35  |
| 1EY0 | ILE | 72  | VAL | 1.2  | 1.35  | 1.43            | 1.45  | 1.57  | 8.92  |
| 1EY0 | THR | 82  | SER | 0.7  | 0.91  | 0.92            | 1.02  | 0.68  | 3.08  |
| 1EY0 | ILE | 92  | VAL | 0.4  | 1.01  | 1.04            | 0.82  | 0.44  | 8.03  |
| 1EY0 | LYS | 116 | GLY | -1   | -5.85 | -2.88           | -1.62 | -1.37 | -0.11 |
| 1EY0 | PRO | 117 | ALA | -0.8 | -9.86 | -1.42           | -0.62 | -0.65 | 6.15  |
| 1EY0 | PRO | 117 | GLY | -0.9 | -9.01 | -2.06           | -1.45 | -1.13 | 7.63  |
| 1EY0 | THR | 120 | CYS | 1.7  | 1.4   | 1.62            | 1.48  | 0.77  | 2.51  |
| 1EY0 | THR | 120 | SER | 0.6  | 0.76  | 0.83            | 0.29  | -0.26 | 1.64  |
| 1EY0 | THR | 120 | VAL | 1.8  | 3.16  | 4.11            | 3.57  | 3.35  | 1.51  |
| 1EY0 | SER | 128 | ALA | -0.7 | -2.02 | -2.01           | -2.22 | -2.1  | -2.96 |
| 1BNI | PHE | 7   | LEU | 4.1  | 2.28  | 2.03            | 2.19  | 2.25  | 8.44  |
| 1BNI | LEU | 14  | ALA | 4.5  | 4.13  | 3.48            | 3.1   | 3.32  | 24.63 |
| 1BNI | THR | 26  | ALA | 1.7  | 1.23  | 0.32            | 0.46  | 1.64  | 2.69  |
| 1BNI | ILE | 51  | VAL | 1.1  | 2.28  | 2.48            | 2.33  | 2.11  | 8.38  |
| 1BNI | ILE | 76  | ALA | 1.7  | 0.76  | 0.23            | 0.59  | 0.07  | 23.6  |
| 1BNI | ILE | 76  | VAL | 1    | 0.61  | 0.61            | 0.69  | 0.46  | 9.7   |
| 1BNI | TYR | 78  | PHE | 1.1  | -0.21 | -1.04           | -0.44 | -0.16 | 5.17  |
| 1BNI | ILE | 88  | ALA | 4    | 5.36  | 4.89            | 4.93  | 5.02  | 25.98 |
| 1BNI | ILE | 88  | VAL | 1.6  | 2.32  | 2.16            | 1.84  | 2.19  | 8.64  |
| 1BNI | LEU | 89  | VAL | 0.5  | 0.45  | 0.88            | 0.35  | 0.42  | 12.34 |
| 1BNI | SER | 91  | ALA | 2.4  | 1.49  | 1.65            | 1.41  | 1.11  | 1.68  |
| 1BNI | ILE | 96  | ALA | 3.2  | 4.61  | 3.88            | 3.53  | 3.86  | 27.03 |
| 1BNI | ILE | 96  | VAL | 3.1  | 1.93  | 1.78            | 1.84  | 1.49  | 10.38 |
| 1L63 | SER | 38  | ASN | 0    | -0.23 | -0.34           | -0.65 | -0.53 | -0.13 |
| 1L63 | LYS | 43  | ALA | 1    | 1.34  | 0.97            | 0.88  | 1.29  | -4.72 |
| 1L63 | SER | 44  | ALA | -0.3 | -0.31 | -0.11           | -0.1  | -0.77 | 1.16  |
| 1L63 | LEU | 46  | ALA | 1.9  | 1.88  | 1.82            | 1.3   | 1.08  | 23.65 |

|      |     |     |     |      |       |                |       |       |       |
|------|-----|-----|-----|------|-------|----------------|-------|-------|-------|
| 1L63 | ASP | 47  | ALA | 1    | 0.52  | 0.32           | 0.65  | 0.67  | 3.98  |
| 1L63 | THR | 59  | ALA | 1.5  | 1.52  | 1.46           | 1.66  | 1.74  | 3.2   |
| 1L63 | THR | 59  | ASN | 1.1  | -0.08 | 0.09           | -0.22 | 0.59  | 3.48  |
| 1L63 | THR | 59  | ASP | 1.2  | 2.29  | 2.77           | 2.45  | 1.76  | 5.66  |
| 1L63 | THR | 59  | GLY | 1.6  | 1.47  | 0.18           | 0.02  | 0.49  | 4.52  |
| 1L63 | THR | 59  | SER | 0.2  | 0.36  | 0.32           | 0.07  | 0.05  | 2.53  |
| 1L63 | THR | 59  | VAL | 1.5  | 2.63  | 2.9            | 2.68  | 2.13  | -1.41 |
| 1L63 | ASP | 92  | ASN | 1.4  | 3.16  | 3.18           | 4.15  | 2.71  | 5.19  |
| 1L63 | THR | 109 | ASN | -0.1 | -0.54 | 0.11           | 0.16  | -0.38 | -0.67 |
| 1L63 | THR | 109 | ASP | -0.6 | -0.39 | -0.33          | 0.26  | -0.35 | -2.91 |
| 1L63 | ASN | 144 | GLU | -0.5 | -1.18 | -1.35          | -1.21 | -0.11 | -1.75 |
| 1L63 | ASP | 72  | PRO | 2.7  | 12.84 | 3.11           | 0.05  | 1.23  | 40.21 |
| 2LZM | ILE | 3   | TYR | 2.3  | 3.04  | 3.07           | 2.72  | 2.46  | 12.34 |
| 2LZM | ILE | 3   | VAL | 0.4  | 0.71  | 0.8            | 0.29  | 0.46  | 8.95  |
| 2LZM | MET | 6   | ILE | 1.4  | 3.1   | 2.95           | 3.53  | 3.03  | 31.8  |
| 2LZM | ASN | 55  | GLY | 0.6  | 1.97  | 0.87           | 0.42  | 0.83  | -3.78 |
| 2LZM | LYS | 60  | PRO | 0    | 4.87  | -0.21          | -0.26 | 0.43  | -7.01 |
| 2LZM | GLY | 77  | ALA | -0.4 | -2.66 | -1.5           | -0.35 | -0.38 | 1.64  |
| 2LZM | ALA | 82  | PRO | -0.8 | 8.08  | -1.33          | -1.43 | -0.68 | 2.9   |
| 2LZM | GLY | 113 | ALA | -0.3 | -2.16 | -0.68          | -0.42 | -0.74 | -3.36 |
| 2LZM | THR | 115 | GLU | -0.3 | -1.78 | -1.95          | -2.1  | -1.92 | -4.69 |
| 2LZM | GLN | 123 | GLU | -0.4 | -1.35 | -1.09          | -0.24 | 0     | 1.51  |
| 2LZM | LYS | 124 | GLY | 0.1  | 3.99  | 2.14           | 1.89  | 1.94  | -0.16 |
| 2LZM | GLY | 156 | ASP | 2.3  | 3.25  | 3.62<br>(5.39) | 4.49  | 4.92  | 23.98 |
| 1RGG | SER | 31  | PRO | -0.7 | NA    | -1.3           | NA    | NA    | -0.97 |
| 1RGG | SER | 42  | GLY | -0.7 | NA    | 0.44           | NA    | NA    | 1.1   |
| 1RGG | SER | 48  | PRO | -1.3 | NA    | -0.73          | NA    | NA    | 0.65  |
| 1RGG | TYR | 49  | PRO | 0.2  | NA    | -0.2           | NA    | NA    | 7.31  |
| 1RGG | THR | 76  | PRO | -1   | NA    | -0.14          | NA    | NA    | 2.4   |
| 1RGG | GLN | 77  | GLY | -0.8 | NA    | -0.25          | NA    | NA    | -1.67 |

|      |     |    |     |      |    |       |    |    |       |
|------|-----|----|-----|------|----|-------|----|----|-------|
| 1RGG | TYR | 86 | GLY | -0.4 | NA | -0.67 | NA | NA | 17.98 |
| 1RGG | GLN | 94 | PRO | 0.8  | NA | 0.54  | NA | NA | 15.03 |
| 1PGA | THR | 2  | PRO | 2.7  | NA | 0.66  | NA | NA | 6.96  |
| 1PGA | GLY | 9  | PRO | 2.4  | NA | 2.63  | NA | NA | 35.34 |
| 1PGA | LYS | 10 | PRO | 0.2  | NA | 2.28  | NA | NA | 53.73 |
| 1PGA | VAL | 21 | PRO | -0.5 | NA | -0.02 | NA | NA | 4.86  |
| 1PGA | ALA | 23 | PRO | 0.3  | NA | 0.43  | NA | NA | 0.31  |
| 1PGA | ALA | 24 | PRO | 0.5  | NA | 2.21  | NA | NA | 6.74  |
| 1PGA | THR | 25 | PRO | 2.8  | NA | 5.3   | NA | NA | 51.79 |
| 1PGA | VAL | 29 | PRO | 3.5  | NA | 4.4   | NA | NA | 48.62 |
| 1PGA | ASP | 36 | PRO | 3.1  | NA | 3.31  | NA | NA | 38.38 |
| 1PGA | ALA | 48 | PRO | 0.7  | NA | 1.51  | NA | NA | 23.34 |

**Table S2. MUE and RMSE for the Pucci set, with or without proline mutations. Data for Figure 2A-B**

| All mutations         | Monopeptide | Tripeptide | Pentapeptide | Heptapeptide |
|-----------------------|-------------|------------|--------------|--------------|
| MUE                   | 1.68        | 0.85       | 0.76         | 0.68         |
| RMSE                  | 2.79        | 1.11       | 1.05         | 0.90         |
|                       |             |            |              |              |
| Non-proline mutations | Monopeptide | Tripeptide | Pentapeptide | Heptapeptide |
| MUE                   | 1.16        | 0.87       | 0.75         | 0.70         |
| RMSE                  | 1.67        | 1.14       | 1.03         | 0.92         |

**Table S3. Error distribution for the Pucci set, with or without proline mutations. Data for Figure 2C-D**

| All mutations         |             |            |                       |              |              |
|-----------------------|-------------|------------|-----------------------|--------------|--------------|
| Error(log[U]/[F])     | Monopeptide | Tripeptide | Post outlier analysis | Pentapeptide | Heptapeptide |
| < 1                   | 66.67       | 75.36      | 80.88                 | 76.81        | 79.71        |
| 1 - 2                 | 14.49       | 18.84      | 17.65                 | 20.29        | 17.39        |
| 2 - 3                 | 8.70        | 4.35       | 1.47                  | 1.45         | 1.45         |
| > 3                   | 10.14       | 1.45       | 0.00                  | 1.45         | 1.45         |
|                       |             |            |                       |              |              |
| Non-proline mutations |             |            |                       |              |              |
| Error(log[U]/[F])     | Monopeptide | Tripeptide | Post outlier analysis | Pentapeptide | Heptapeptide |
| < 1                   | 71.88       | 73.44      | 79.37                 | 76.56        | 79.69        |
| 1 - 2                 | 15.63       | 20.31      | 19.05                 | 20.31        | 17.19        |
| 2 - 3                 | 9.38        | 4.69       | 1.59                  | 1.56         | 1.56         |
| > 3                   | 3.13        | 1.56       | 0.00                  | 1.56         | 1.56         |

**Table S4. Comparison to common protein thermostability predictors for both forward and reverse mutations.**

|                      | FEP+ | MMGBSA | PopMuSiC <sup>sym</sup> |      | MUPRO |      | FoldX |      | Rosetta |      |
|----------------------|------|--------|-------------------------|------|-------|------|-------|------|---------|------|
|                      |      |        | Forw                    | Rev  | Forw  | Rev  | Forw  | Rev  | Forw    | Rev  |
| <b>MUE</b>           | 0.85 | NA     | 1.08                    | 1.06 | 0.70  | 2.01 | 1.20  | 1.49 | 1.65    | 1.63 |
| <b>RMSE</b>          | 1.11 | NA     | 1.46                    | 1.46 | 1.21  | 2.45 | 1.79  | 2.03 | 2.19    | 2.34 |
| <b>R<sup>2</sup></b> | 0.68 | 0.39   | 0.27                    | 0.42 | 0.36  | 0.10 | 0.22  | 0.23 | 0.39    | 0.21 |
| <b>Accuracy</b>      | 0.85 | 0.74   | 0.65                    | 0.67 | 0.77  | 0.30 | 0.70  | 0.65 | 0.64    | 0.64 |
| <b>Sensitivity</b>   | 0.89 | 0.46   | 0.68                    | 0.79 | 0.32  | 1.00 | 0.68  | 0.79 | 0.53    | 0.76 |
| <b>Specificity</b>   | 0.84 | 0.86   | 0.64                    | 0.62 | 0.94  | 0.04 | 0.70  | 0.60 | 0.68    | 0.60 |
